# Supplementary figures and images for: The Mixed Lineage Nature of Nitrogen Transport and Assimilation in Marine Eukaryotic Phytoplankton: A Case Study of Micromonas
Source: PubMed Central journal article supplement — Mol Biol Evol. 2010 May 9;27(10):2268–83. doi: 10.1093/molbev/msq113 (PMC2944026; doi:10.1093/molbev/msq113), 2010-05-09

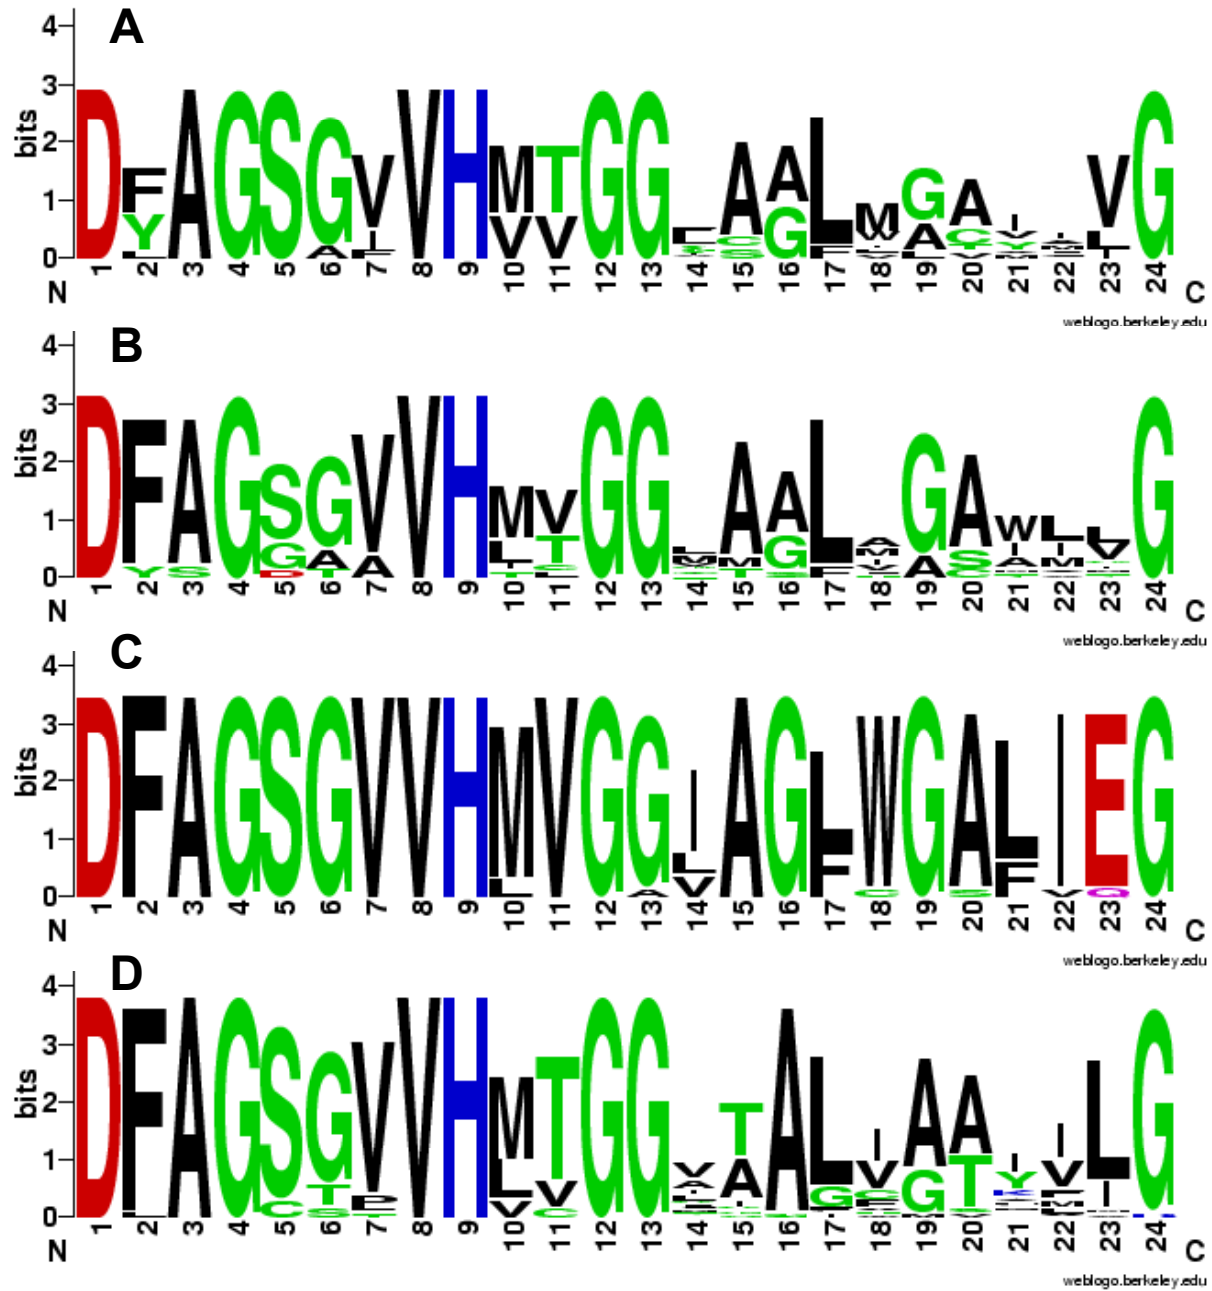

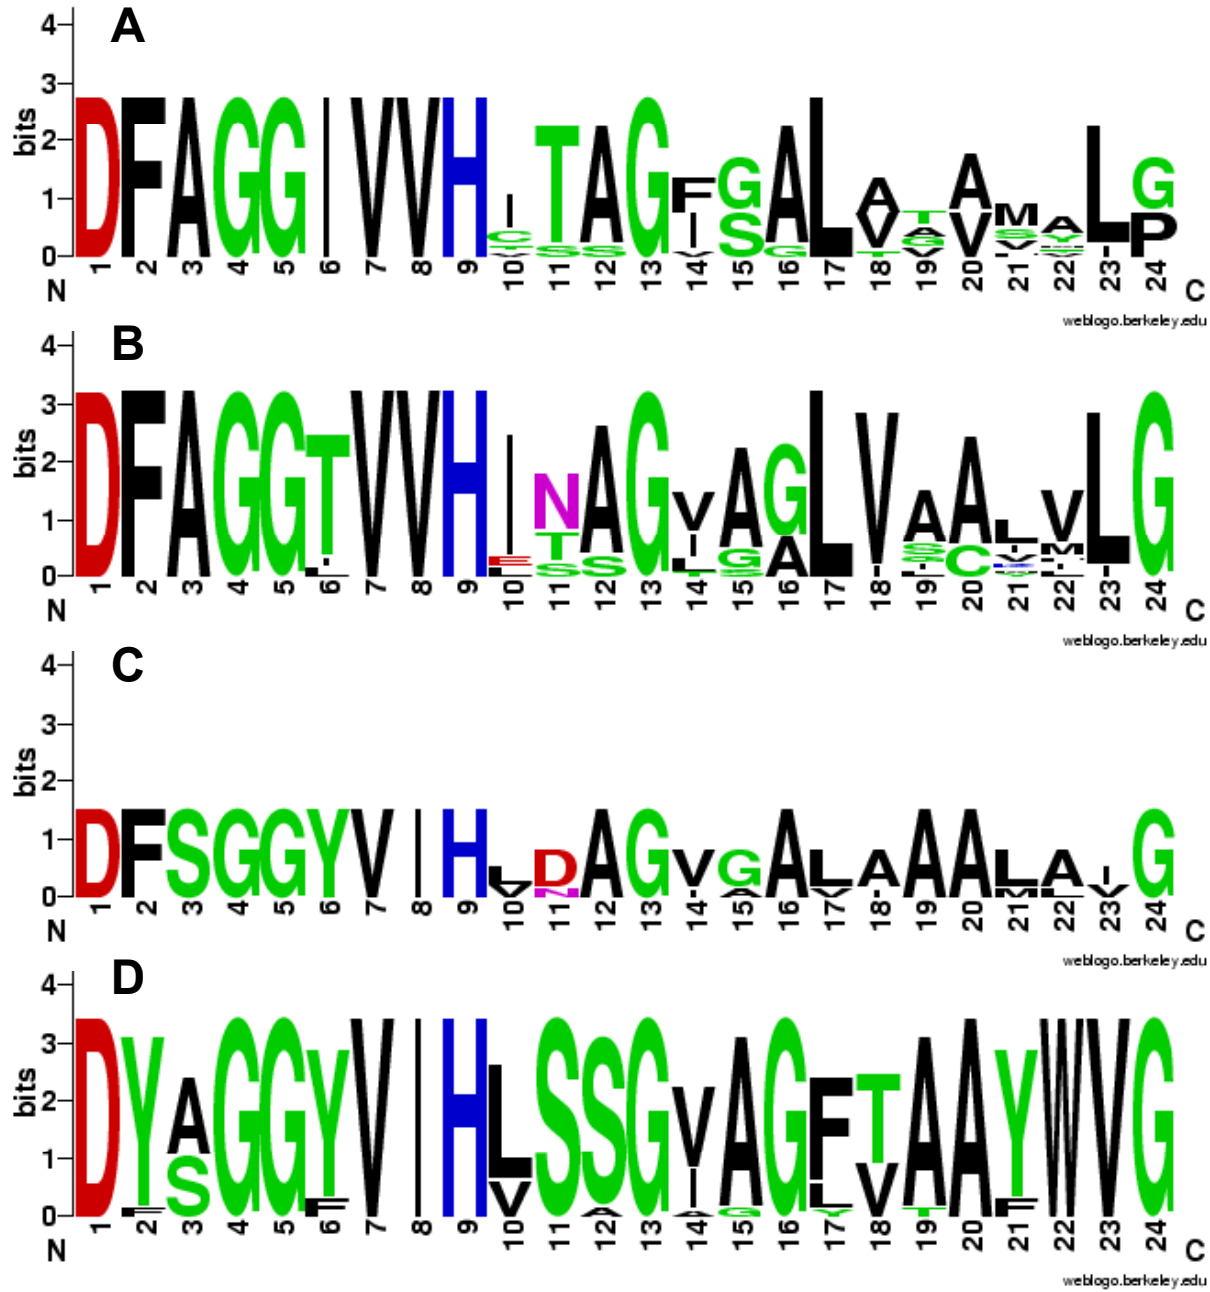

Supplementary Figure 1 McDonald et al.

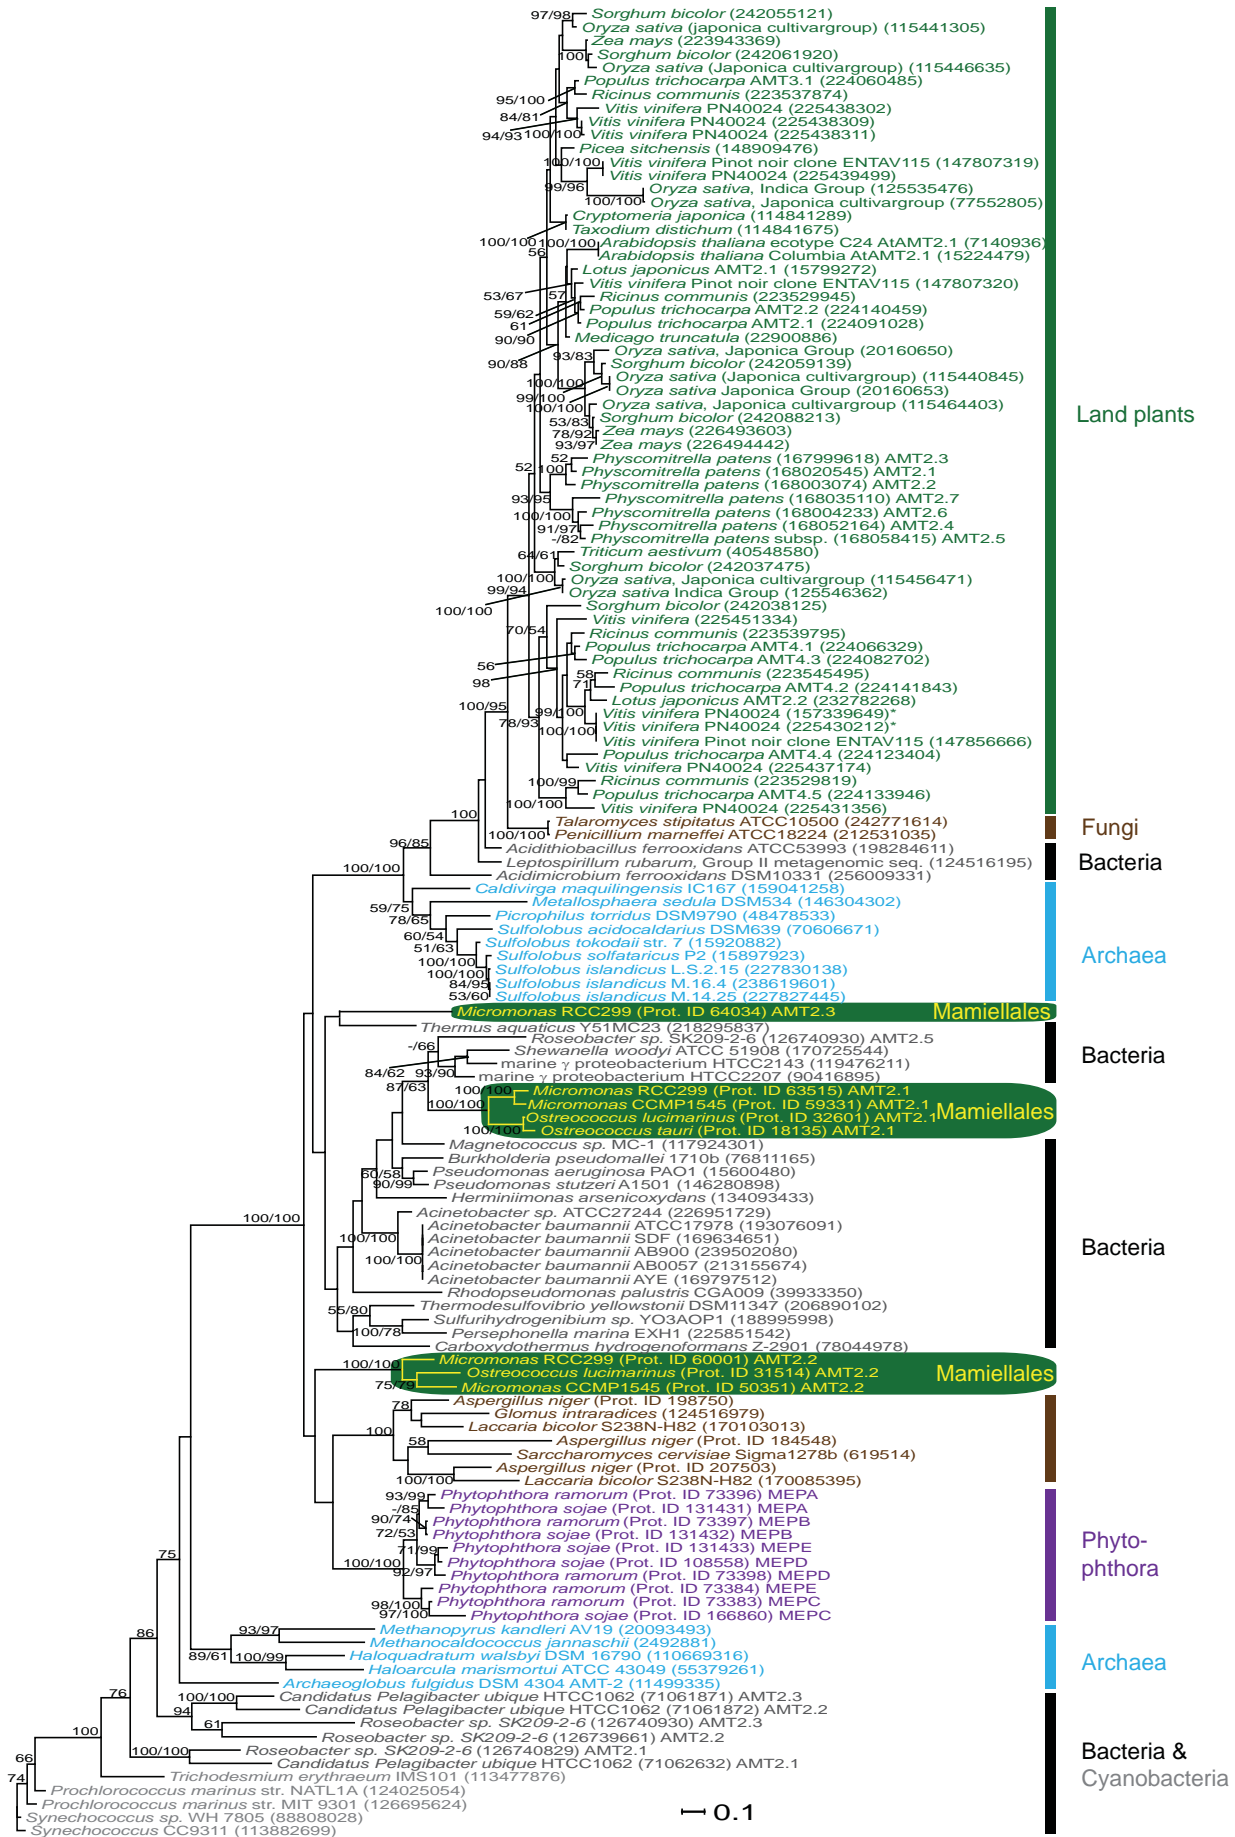

Supplement: supp_msq113_mbe-09-0962-File005.pdf [file supp_msq113_mbe-09-0962-File005.pdf]
